# Supplementary material for: Optimization and validation of an ELISA assay for the determination of antibody responses to CN54gp140 and AIDSVAX BE for use in the Phase IIb PrEPVacc vaccine trial
Source: PLoS One. 2022 Nov 3;17(11):e0275927. doi: 10.1371/journal.pone.0275927 (PMC9632806; doi:10.1371/journal.pone.0275927)
Supplement: S1 Data — (XLSX) [file pone.0275927.s001.xlsx]

## Sheet: CN54 Positive Samples
EV0619012 V05	0.0476	0.0531	0.0511
EV0619012 V07	0.0472	0.0518	0.0532
EV0619023 V05	0.0507	0.0535	0.0539
EV0619023 V07	1.257	1.2497	1.2819
EV0619025 V05	0.2767	0.2311	0.2645
EV0619025 V07	1.4745	1.392	1.4005
EV0619028 V05	0.3291	0.33	0.3613
EV0619028 V07	1.4128	1.342	1.3967
EV0619029 V05	0.5401	0.4533	0.4915
EV0619029 V07	1.1838	1.2289	1.297
EV0619052 V05	0.3907	0.3844	0.3957
EV0619052 V07	1.1888	1.2101	1.3304
EV0619071 V05	0.0637	0.0605	0.0618
EV0619071 V07	0.3258	0.3227	0.3307
EV0619082 V05	0.0492	0.0499	0.0485
EV0619082 V07	0.0521	0.0516	0.0544
EV0619083 V05	0.5727	0.579	0.6145
EV0619084 V05	0.6527	0.8371	0.8595
EV0619084 V07	0.5312	0.5781	0.6109
EV0619085 V05	1.0867	1.1121	1.1227
EV0619085 V07	0.2595	0.2483	0.2169
EV0619092 V05	1.0877	1.0877	1.1415
EV0619092 V07	0.2676	0.2458	0.2387
EV0619093 V05	0.5747	0.5849	0.5749
EV0619093 V07	0.0525	0.055	0.0544
EV0619094 V05	0.0529	0.0513	0.0552
EV0619094 V07	0.4772	0.5016	0.4897
EV0619116 V05	0.9192	0.9608	1.0764
EV0619116 V07	0.099	0.1376	0.142
EV0619128 V05	1.3803	1.4586	1.4615
EV0619128 V07	0.5328	0.5014	0.5266
EV0619132 V05	1.5555	1.612	1.6083
EV0619132 V07	0.7677	0.7385	0.7453
EV0619140 V05	1.2269	1.2076	1.288
EV0619140 V07	0.4004	0.4343	0.4097
EV0619142 V05	0.5983	0.6113	0.6933
EV0619142 V07	0.8292	0.8415	0.7922
EV0619149 V05	1.2866	1.2314	1.3729
EV0619149 V07	0.1694	0.1438	0.1911
EV0619160 V05	0.564	0.6157	0.5038
EV0619160 V07	0.048	0.0514	0.0541
EV0619164 V05	0.051	0.0538	0.0456
EV0619164 V07	0.0563	0.0537	0.0521
EV0619166 V05	0.0541	0.0583	0.0564
EV0619166 V07	1.1516	1.2017	1.2527
EV0619172 V05	1.0239	1.0094	1.0804
EV0619172 V07	0.6882	0.6097	0.7186
EV0619187 V05	0.4551	0.4403	0.4739
EV0619187 V07	0.2655	0.2468	0.2571
EV0619209 V05	0.8248	0.7729	0.8121
EV0619209 V07	0.6931	0.7381	0.75
EV0619223 V05	1.0576	1.1284	1.1074
EV0619223 V07	0.0519	0.0526	0.0528
1PV	0.1905	0.1687	0.1759
2PV				1.4901	1.4745	1.4564
3PV				1.4268	1.4112	1.4512
4PV				0.5427	0.5591	0.5569
5PV				1.4571	1.4776	1.4418
6PV				0.2281	0.2094	0.1938
7PV				0.5903	0.5702	0.6198
8PV				1.7821	1.8196	1.817
9PV				0.6312	0.6133	0.5945
10PV				1.246	1.2002	1.1913
11PV				1.3836	1.3647	1.3337
12PV				1.6984	1.7663	1.7629
13PV				1.1803	1.148	1.1748
14PV				1.2762	1.281	1.33
15PV				1.5576	1.5995	1.5961
16PV				1.7205	1.7226	1.7331
17PV				0.8923	0.819	0.85
18PV				1.3223	1.3664	1.31
19PV				0.8537	0.8397	0.864
20PV				0.5401	0.5552	0.5428
21PV				1.1944	1.1939	1.1712
22PV				1.5036	1.5231	1.5009
23PV				0.925	0.9229	0.8863
24PV				1.2235	1.2406	1.3001
25PV				1.481	1.491	1.5247
26PV				1.4934	1.511	1.4768
27PV				1.1306	1.1148	1.0599
28PV				1.7417	1.7196	1.7756
29PV				0.2792	0.2576	0.3145
30PV				0.2005	0.2188	0.2049

## Sheet: AIDSVAX Posititve Samples
EV0619012 V05	0.0544	0.0537	0.0524
EV0619012 V07	0.0536	0.0519	0.0504
EV0619023 V05	1.0669	1.0434	1.0711
EV0619023 V07	1.2496	1.1656	1.1935
EV0619025 V05	1.121	1.1472	1.1412
EV0619025 V07	1.3551	1.3268	1.3278
EV0619028 V05	1.1017	1.0827	1.0949
EV0619028 V07	0.049	0.0537	0.0518
EV0619029 V05	1.1647	1.1502	1.1551
EV0619029 V07	1.1771	1.1895	1.1834
EV0619052 V05	1.2577	1.257	1.2639
EV0619052 V07	1.2818	1.252	1.2725
EV0619071 V05	0.3021	0.2976	0.3206
EV0619071 V07	1.0067	1.0219	0.9711
EV0619082 V05	0.0581	0.0784	0.0631
EV0619082 V07	0.0571	0.0575	0.0576
EV0619083 V05	0.7516	0.7843	0.8048
EV0619084 V05	1.1395	1.1615	1.144
EV0619084 V07	1.1129	1.0807	1.067
EV0619085 V05	1.0923	1.1349	1.0982
EV0619085 V07	0.9237	1.2417	1.2401
EV0619092 V05	1.1517	1.1359	1.1203
EV0619092 V07	1.0401	1.096	1.1244
EV0619093 V05	0.0693	0.0716	0.077
EV0619093 V07	0.1026	0.1032	0.1054
EV0619094 V05	1.1677	1.2364	1.163
EV0619094 V07	1.1876	1.2039	1.2186
EV0619116 V05	1.0236	1.0843	1.0623
EV0619116 V07	1.2857	1.2653	1.2848
EV0619128 V05	1.3054	1.2978	1.2855
EV0619128 V07	1.3583	1.3167	1.3633
EV0619132 V05	1.3	1.3009	1.2952
EV0619132 V07	1.3003	1.2464	1.2458
EV0619140 V05	1.2553	1.267	1.2375
EV0619140 V07	1.2349	1.4154	1.2102
EV0619142 V05	1.2494	1.2476	1.191
EV0619142 V07	1.223	1.2398	1.234
EV0619149 V05	1.0144	1.0053	0.9638
EV0619149 V07	1.0219	0.9842	1.0446
EV0619160 V05	0.0752	0.079	0.0627
EV0619160 V07	0.0776	0.0786	0.0778
EV0619164 V05	0.0648	0.0655	0.0468
EV0619164 V07	0.0699	0.0646	0.0623
EV0619166 V05	1.2197	1.2494	1.2034
EV0619166 V07	1.1545	1.1042	1.1914
EV0619172 V05	0.9771	1.0088	1.0068
EV0619172 V07	1.1563	1.2428	1.1632
EV0619187 V05	0.8129	0.8215	0.8395
EV0619187 V07	0.9444	1.0513	1.1189
EV0619209 V05	1.4325	1.4229	1.4047
EV0619209 V07	1.2394	1.277	1.3045
EV0619223 V05	0.2601	0.2997	0.2782
EV0619223 V07	0.5867	0.6448	0.6445
1PV				0.2883	0.2848	0.2831
2PV				0.6381	0.5183	0.4435
3PV				0.2003	0.1912	0.2049
4PV				0.4407	0.4038	0.3995
5PV				0.0808	0.0698	0.081
6PV				0.2685	0.3104	0.2844
7PV				0.2897	0.3007	0.2853
8PV				0.7071	0.7508	0.7234
9PV				0.5729	0.6298	0.6653
10PV				0.2799	0.3118	0.2716
11PV				0.2808	0.3019	0.2933
12PV				0.581	0.5719	0.5785
13PV				0.3326	0.3538	0.3464
14PV				0.3837	0.3564	0.3923
15PV				0.4683	0.4579	0.4377
16PV				0.5629	0.5543	0.5622
17PV				0.2452	0.2496	0.2247
18PV				0.2358	0.2496	0.2546
19PV				0.1685	0.1769	0.1714
20PV				0.3732	0.3697	0.3601
21PV				0.3139	0.3352	0.3038
22PV				0.4713	0.4361	0.4735
23PV				0.5815	0.5609	0.3724
24PV				0.1559	0.1482	0.1449
25PV				0.3068	0.3031	0.3045
26PV				0.5147	0.5023	0.5056
27PV				0.3368	0.3468	0.3353
28PV				0.2832	0.2832	0.2762
29PV				0.6161	0.6349	0.6588
30PV				0.2005	0.2188	0.2049

## Sheet: Fig1A
25	37
1.84063	1.9877
1.77013	1.8884
1.47133	1.61883
0.852767	1.04813
0.379967	0.487467
0.173033	0.2142
0.090067	0.1088
0.062067	0.067067
0.050367	0.053133
0.0463	0.048233
0.0456	0.0459

## Sheet: Fig1B
25	37
1.4514	1.5691
1.17217	1.28097
0.778733	0.9576
0.490367	0.618333
0.282733	0.364233
0.175767	0.229733
0.113733	0.138633
0.0798	0.0928
0.083433	0.070767
0.0601	0.058133
0.050933	0.052767

## Sheet: Fig1C
CN54	AIDSVAX
1.5691	1.6635
1.28097	1.45173
0.9576	1.05093
0.618333	0.657433
0.364233	0.404967
0.229733	0.231033
0.138633	0.140933
0.0928	0.088433
0.070767	0.0685
0.058133	0.0574
0.052767	0.0522

## Sheet: Fig1D
CN54			AIDSVAX
0.1393	0.1282	0.1275	1.0503	1.0607	1.0665

## Sheet: Fig2A
1.826	1.874	0.046	15
1.543	1.614	0.047	15
0.959	1.263	0.049	15
0.483	0.842	0.065	15
0.204	0.535	0.025	15
0.095	0.317	0.018	15
0.061	0.185	0.009	15
0.05	0.114	0.007	15
0.047	0.073	0.009	15
0.045	0.057	0.005	15
0.046	0.049	0.004	15

## Sheet: Fig2B
1.836	1.914	0.047	12
1.762	1.589	0.105	12
1.578	1.25	0.038	12
1.062	0.839	0.034	12
0.522	0.503	0.027	12
0.231	0.292	0.011	12
0.108	0.169	0.009	12
0.067	0.102	0.006	12
0.052	0.072	0.006	12
0.049	0.053	0.006	12
0.046	0.042	0.005	12

## Sheet: Fig2C
1.821	1.777	0.151	15
1.508	1.46	0.152	15
0.965	1.058	0.127	15
0.462	0.688	0.113	15
0.203	0.41	0.074	15
0.1	0.243	0.038	15
0.065	0.148	0.021	15
0.054	0.097	0.009	15
0.05	0.071	0.008	15
0.05	0.056	0.005	15
0.049	0.051	0.006	15

## Sheet: Fig2D
1.885	1.87	0.127	15
1.814	1.549	0.124	15
1.474	1.135	0.131	15
0.925	0.729	0.121	15
0.44	0.435	0.074	15
0.193	0.251	0.045	15
0.094	0.153	0.018	15
0.063	0.098	0.011	15
0.05	0.071	0.009	15
0.046	0.056	0.005	15
0.046	0.05	0.005	15

[truncated: 10 more sheets: Fig3A, Fig3B, Fig4, Fig5, AIDSVAX Inter Operator , CN54 Inter Operator, CN54 Inter Assay , AIDSVAX Inter Assay , AIDSVAX Intra Assay , CN54 Intra Assay]
